# Supplementary material
Source: publisher site journal article supplement (https://www.dovepress.com/article/581751)
Supplement: Supplementary file 1 [file 581751_Supplementary%20Materials.docx]

| **Supplementary Table 1A. The results of the differential metabolite screening for UC-NAFLD vs only-NAFLD.** | | | | | | | | |
| --- | --- | --- | --- | --- | --- | --- | --- | --- |
| **id** | **Name** | **Mean.UC** | **Mean.HC** | **VIP** | **P.value** | **FDR** | **Fold.Change** | **Log2.Fold.Change** |
| 178 | 1-Myristoyl-sn-glycero-3-phosphocholine (LPC(14:0/0:0)) | 1.40787367749803 | 3.71405858762246 | 1.60554318865584 | 0.0399998797018959 | 0.678178893531872 | 0.379066092869384 | -1.3994786804177 |
| 274 | LPC(13:0) | 0.529123042687415 | 0.975541216849728 | 1.35368274715052 | 0.0210707311201498 | 0.678178893531872 | 0.542389223077717 | -0.882599581543627 |
| 359 | 1-oleoyl-2-myristoyl-sn-glycero-3-phosphocholine | 1.59298832725689 | 3.94309426311502 | 1.50993043511468 | 0.0201571157865367 | 0.678178893531872 | 0.403994482748794 | -1.30759250429966 |
| 369 | Euscaphic acid | 0.0619821519475121 | 0.163758917231755 | 1.3332128962938 | 0.0178062559591386 | 0.678178893531872 | 0.37849634691828 | -1.40164871887269 |
| 394 | PC(14:0/16:0) | 0.297847580013515 | 0.807733014449251 | 1.2503233846065 | 0.0448253911947454 | 0.678178893531872 | 0.368745086167613 | -1.43930427049868 |
| 397 | LPA(18:0) | 0.0694805166507978 | 0.228885285932507 | 1.55752120965801 | 0.00927789893354192 | 0.678178893531872 | 0.303560433636989 | -1.71994433415907 |
| 398 | 1-Oleoyl-sn-glycerol 3-phosphate | 0.0637019412259698 | 0.127200772181602 | 1.19107544256714 | 0.0423833836294826 | 0.678178893531872 | 0.500798384580747 | -0.997698186293156 |
| 399 | 1-Palmitoyllysophosphatidate | 0.166540103296264 | 0.430975797444908 | 1.29558245746798 | 0.0306026372019177 | 0.678178893531872 | 0.386425651471887 | -1.37173722943273 |
| 405 | 2-Linoleoyl-1-palmitoyl-sn-glycero-3-phosphoethanolamine | 2.17622627543822 | 6.2320273642122 | 1.23961021817084 | 0.0364160517763351 | 0.678178893531872 | 0.349200372247294 | -1.51787299800753 |
| 452 | PC(32:1) | 0.0176521575144484 | 0.053393829513707 | 1.40883948047196 | 0.0298276739876528 | 0.678178893531872 | 0.330602949352356 | -1.59682849972768 |
| 471 | Piperidine | 2.67037030286439 | 4.77067729325904 | 1.98702032379473 | 0.0125521670243359 | 0.678178893531872 | 0.559746580771167 | -0.837154284528645 |
| 547 | 6-Chloro-1H-indazole-3-carbonitrile | 0.0130809395652857 | 0.00338221021966314 | 1.50167734989482 | 0.0276634783165355 | 0.678178893531872 | 3.86757141505785 | 1.95142793141538 |
| 570 | cis-4,10,13,16-Docosatetraenoic acid | 0.255025135138182 | 0.507789888689887 | 1.1360961978045 | 0.0492651362518922 | 0.678178893531872 | 0.502225705588888 | -0.993592222437805 |
| 595 | Mupirocin | 0.0224350063810347 | 0.0557841895121467 | 1.37239923466155 | 0.04309038299105 | 0.678178893531872 | 0.402174999354424 | -1.31410469357338 |
| 599 | Glycerophospho-N-palmitoylethanolamine | 0.882689285158832 | 1.56326177457578 | 1.38023869936966 | 0.0279707279946433 | 0.678178893531872 | 0.564645857472186 | -0.824581793479979 |
| 601 | CMPF | 1.66172902508157 | 4.65177333677249 | 1.63602860983544 | 0.0370220729211904 | 0.678178893531872 | 0.357224848413298 | -1.48509565766507 |
| 611 | 2-Methylpropanamine | 7.49385041532843 | 10.8826298768067 | 1.80319454292569 | 0.0224355582061511 | 0.678178893531872 | 0.688606568463701 | -0.538248152369293 |
| 651 | N-Lauroyl-D-erythro-sphingosylphosphorylcholine | 0.135954480912634 | 0.351937792460589 | 1.32912915978132 | 0.0284576069086869 | 0.678178893531872 | 0.386302590472316 | -1.37219674284423 |
| 661 | 1,2-Dipalmitoleoyl-sn-glycero-3-phosphocholine | 0.40900780967401 | 1.20693218954234 | 1.3504215479898 | 0.0141578500210603 | 0.678178893531872 | 0.338882178483535 | -1.56114432613708 |
| 687 | 3,5,9-Trioxa-4-phosphatetracosan-1-aminium, 7-(acetyloxy)-24-carboxy-4-hydroxy-N,N,N-trimethyl-, inner salt, 4-oxide, (R)- | 0.210731253611223 | 0.395096935502723 | 1.56141727957243 | 0.0122875463653809 | 0.678178893531872 | 0.533365953201048 | -0.906802359829242 |
| 714 | [2-[docosa-7.10.13.16-tetraenoyloxy]-3-(octadecanoyloxy)propoxy]({[2.3.4.5.6-pentahydroxycyclohexyl]oxy})phosphinic acid | 0.0980843196484019 | 0.181393319306833 | 1.21867949627881 | 0.0472789423880457 | 0.678178893531872 | 0.540727299236907 | -0.887026900517562 |
| 759 | (2-{[3-hydroxy-2-tetradecanamidooctadec-4-en-1-yl phosphonato]oxy}ethyl)trimethylazanium | 0.599495109592592 | 1.31668609078504 | 1.21545239880774 | 0.00629589658200502 | 0.678178893531872 | 0.455306024562892 | -1.13509154581027 |
| 772 | 2-Oleoyl-1-stearoyl-sn-glycero-3-phosphoserine | 0.0918703593080022 | 0.0381040194246891 | 2.08970542121724 | 0.0256948100751825 | 0.678178893531872 | 2.41104116298229 | 1.26965628185022 |
| 857 | 2-Arachidonoyl-1-stearoyl-sn-glycero-3-phosphoethanolamine | 2.99719607597576 | 6.56326312673788 | 1.15614800908047 | 0.0331534706972474 | 0.678178893531872 | 0.456662489084976 | -1.13079980535424 |
| 883 | N-Docosanoyltaurine | 1.13981226334424 | 2.97157205152742 | 1.26308764632958 | 0.0204054032749083 | 0.678178893531872 | 0.38357214416469 | -1.38243014234852 |
| 954 | 1-(4-Chlorophenyl)-2-[(5-methyl-4H-1,2,4-triazol-3-yl)sulfanyl]ethanone | 4.67593918593466 | 12.2477832912123 | 1.88774585862149 | 0.0194344102718129 | 0.678178893531872 | 0.381778406325137 | -1.38919258975851 |
| 1014 | (1,5-Dimethyl-1H-pyrazol-3-yl)methylamine | 0.0280632452448988 | 0.0427827783832918 | 2.08956631195603 | 0.0161258990000646 | 0.678178893531872 | 0.655947236373468 | -0.608348324074233 |
| 1031 | Luminol | 0.762226415251638 | 0.965415687659248 | 1.80052509702854 | 0.0354456432432739 | 0.678178893531872 | 0.789531830687086 | -0.340930664078985 |
| 1076 | PC(20:2(11Z,14Z)/18:3(9Z,12Z,15Z)) | 0.174288242467531 | 0.344407013485958 | 1.19466696196059 | 0.0183319757362544 | 0.678178893531872 | 0.50605311635048 | -0.982639273853882 |
| 1149 | 2-amino-3-({[3-(hexadecanoyloxy)-2-(octadecanoyloxy)propoxy](hydroxy)phosphoryl}oxy)propanoic acid | 1.62096933348942 | 4.66868705020031 | 1.25576943204071 | 0.0492620205306085 | 0.678178893531872 | 0.347200254816795 | -1.52616008828356 |
| 1214 | PC(20:3(5Z,8Z,11Z)/18:0) | 0.073960228103265 | 0.182153927468762 | 1.36887336395072 | 0.0190805743527101 | 0.678178893531872 | 0.406031476405848 | -1.3003365224168 |
| 1223 | LysoPC(16:1(9Z)) | 2.45585755536547 | 4.61865738941182 | 1.50520221474243 | 0.0298812687840258 | 0.678178893531872 | 0.531725423278955 | -0.911246647534469 |
| 1251 | Albendazole sulfone | 0.106503907228916 | 0.0548820562132401 | 2.25135415625341 | 0.0347431055887242 | 0.678178893531872 | 1.94059615432597 | 0.956499918788107 |
| 1262 | PC(20:3(5Z,8Z,11Z)/14:0) | 1.55485623081385 | 3.29464937950422 | 1.43518955717273 | 0.0136804759378508 | 0.678178893531872 | 0.471933748242376 | -1.08334375180632 |
| 1274 | (3beta,5alpha,6beta,22E,24R)-23-Methylergosta-7,22-diene-3,5,6-triol | 0.389142122619131 | 0.698446078819357 | 1.34278433851963 | 0.0400162799046253 | 0.678178893531872 | 0.557154137477487 | -0.843851588486159 |
| 1295 | Cephalexin | 0.00507338513397099 | 0.0115060183443563 | 1.50921766265161 | 0.0405876312560088 | 0.678178893531872 | 0.440933169245249 | -1.18136808696136 |
| 1306 | Maslinic_Acid | 0.00821912801738978 | 0.026772290897151 | 1.64007249866702 | 0.00285805905116971 | 0.678178893531872 | 0.307001296563098 | -1.70368334632383 |
| 1307 | 2-Deoxybrassinolide | 0.194184707405251 | 0.40768339150417 | 1.24392180527227 | 0.0288399778722404 | 0.678178893531872 | 0.476312529408657 | -1.0700195955703 |
| 1348 | 24-epi-brassinolide | 0.0930634545710802 | 0.203633261573437 | 1.26583232869945 | 0.0136225808868158 | 0.678178893531872 | 0.457014997707133 | -1.12968658439029 |
| 1402 | Putative Phenylalanine conjugated chenodeoxycholic acid | 0.19175775823216 | 0.408381262471697 | 1.50566990848913 | 0.0243334704404443 | 0.678178893531872 | 0.469555721218845 | -1.09063172517417 |
| 1415 | (2-aminoethoxy)[2-[docosa-4.7.10.13.16-pentaenoyloxy]-3-(octadecanoyloxy)propoxy]phosphinic acid | 0.115987056655324 | 0.468621587549773 | 1.39829122170677 | 0.0476971347483533 | 0.678178893531872 | 0.247506857850428 | -2.01445959535275 |
| 1575 | columbianetin | 0.271575951712061 | 0.523906353695028 | 1.16350504773752 | 0.0201994993605913 | 0.678178893531872 | 0.518367356678687 | -0.947953225122751 |

| **Supplementary Table 1B. The results of the differential metabolite screening for CD-NAFLD vs only-NAFLD.** | | | | | | | | |
| --- | --- | --- | --- | --- | --- | --- | --- | --- |
| **id** | **Name** | **Mean.UC** | **Mean.HC** | **VIP** | **P.value** | **FDR** | **Fold.Change** | **Log2.Fold.Change** |
| 5 | Trimethylamine N-oxide | 0.252369151185651 | 0.916568863005294 | 1.84678504634495 | 0.0119670833056058 | 0.511743888463837 | 0.275341178793888 | -1.86070770580721 |
| 32 | 2-Hydroxyhexanoic acid | 1.652380441176 | 1.11701002553648 | 1.62927651850589 | 0.0433178415700239 | 0.57776460770312 | 1.47928881872157 | 0.564903754031505 |
| 42 | 2-Ethyl-2-hydroxybutyric acid | 1.652380441176 | 1.11701002553648 | 1.62927651850589 | 0.0433178415700239 | 0.57776460770312 | 1.47928881872157 | 0.564903754031505 |
| 45 | Serine | 0.394554790526457 | 0.546024802137684 | 1.98614727031732 | 0.0153056172626351 | 0.511743888463837 | 0.722594997483222 | -0.468740827843451 |
| 75 | myo-Inositol | 0.182670095474457 | 0.26396314393133 | 1.69045262876891 | 0.0490839245433884 | 0.592738721371853 | 0.692028791420893 | -0.531096033360529 |
| 81 | Glyoxylic acid | 0.994477271153945 | 1.2485306408156 | 1.73143486240611 | 0.0283015404821759 | 0.530224626873202 | 0.796518113888099 | -0.328220923947347 |
| 84 | Taurine | 2.16876964691433 | 3.09608594921615 | 1.69475093432454 | 0.0485684740662998 | 0.592738721371853 | 0.700487545400155 | -0.513568694979545 |
| 85 | Acetylglycine | 0.127521465938733 | 0.0751330016497662 | 1.71623001100786 | 0.030368109530657 | 0.539020726946929 | 1.69727633847476 | 0.763221473360778 |
| 95 | Apocholic acid | 0.0434282521091178 | 0.177334481819213 | 1.32003324932942 | 0.00581995731318579 | 0.511743888463837 | 0.244894572468944 | -2.02976729468457 |
| 123 | 1,5-Anhydroglucitol | 4.26309120565866 | 2.19991446347782 | 1.63112398453305 | 0.0212303514174691 | 0.514236659874294 | 1.93784407368239 | 0.954452490683203 |
| 150 | LacCer(d18:1/16:0) | 0.602524168105027 | 0.290313086341347 | 1.94557547293132 | 0.0124313393331894 | 0.511743888463837 | 2.07542889539807 | 1.0534095057725 |
| 167 | Mannose | 3.6261378469801 | 5.16923794590307 | 1.97138101260163 | 0.016752271848845 | 0.511743888463837 | 0.701484026258461 | -0.51151784278857 |
| 191 | Hydroxyisocaproic acid | 1.652380441176 | 1.11701002553648 | 1.62927651850589 | 0.0433178415700239 | 0.57776460770312 | 1.47928881872157 | 0.564903754031505 |
| 249 | 3alpha-Hydroxy-12-oxo-5beta-cholan-24-oic acid | 0.144811867677492 | 0.348479073556739 | 2.12550088242231 | 0.00434507528318379 | 0.511743888463837 | 0.415553984919309 | -1.26689218415845 |
| 274 | LPC(13:0) | 0.570444942861027 | 0.975541216849728 | 1.88596404126724 | 0.0127016803352407 | 0.511743888463837 | 0.584747146515387 | -0.774115178443298 |
| 289 | 7-Ketolithocholic acid | 0.144811867677492 | 0.348479073556739 | 2.12550088242231 | 0.00434507528318379 | 0.511743888463837 | 0.415553984919309 | -1.26689218415845 |
| 297 | Galactose | 3.6261378469801 | 5.16923794590307 | 1.97138101260163 | 0.016752271848845 | 0.511743888463837 | 0.701484026258461 | -0.51151784278857 |
| 301 | 3alpha-Hydroxy-6-oxo-5alpha-cholan-24-oic acid | 0.144811867677492 | 0.348479073556739 | 2.12550088242231 | 0.00434507528318379 | 0.511743888463837 | 0.415553984919309 | -1.26689218415845 |
| 303 | SM(d18:1/18:0) | 15.912266435297 | 12.1205749875504 | 1.79118811939115 | 0.0428761140734124 | 0.57776460770312 | 1.31283098793921 | 0.392681197604267 |
| 314 | LPC(16:0) | 0.961556951512594 | 1.59936011709071 | 1.81691960018464 | 0.0178186837312015 | 0.511743888463837 | 0.601213536111991 | -0.734050603494358 |
| 369 | Euscaphic acid | 0.0705313638322577 | 0.163758917231755 | 1.95235708875377 | 0.0157575974615269 | 0.511743888463837 | 0.430702431504481 | -1.21523662663716 |
| 407 | N-Acetylgalactosamine | 0.0164954435998751 | 0.0114284189564422 | 2.23908235426144 | 0.0028531802738889 | 0.511743888463837 | 1.4433705714452 | 0.529441745394569 |
| 411 | N-Acetylmannosamine | 0.0164954435998751 | 0.0114284189564422 | 2.23908235426144 | 0.0028531802738889 | 0.511743888463837 | 1.4433705714452 | 0.529441745394569 |
| 414 | 2-Hydroxyhexanedioic acid | 0.516051285716754 | 0.719243795726684 | 1.93063376278709 | 0.0205051890577988 | 0.513993439805172 | 0.717491466430189 | -0.47896642186149 |
| 452 | PC(32:1) | 0.0217694125630832 | 0.053393829513707 | 1.79921431538093 | 0.0436566274636716 | 0.57776460770312 | 0.407714014172643 | -1.29437054809304 |
| 455 | (3R)-3-Hydroxy-L-proline | 0.240004984244013 | 0.41494663492097 | 1.43273695488197 | 0.0440094351452119 | 0.578620881067488 | 0.578399639967495 | -0.789861440622659 |
| 459 | N-Nitroso-N-methyl-3-aminopropionic acid | 0.179676840388031 | 0.259313911936702 | 1.73484788828413 | 0.0320474952050713 | 0.543345803247341 | 0.692893177408431 | -0.529295144115312 |
| 466 | Methylacetate | 0.0787654463230632 | 0.127078531703817 | 1.93272747443337 | 0.0245264618455162 | 0.525372237901318 | 0.619817094728815 | -0.690085549481814 |
| 495 | 3-Hydroxylidocaine | 0.00493457329838783 | 0.01693446783032 | 1.56049883330435 | 0.0286605540799761 | 0.530944412544726 | 0.291392286302189 | -1.77896540781052 |
| 497 | 3.beta.,7.alpha.-Dihydroxy-5-cholestenoic acid | 0.25709668912332 | 0.632267713728525 | 1.99734255043555 | 0.0312991316719842 | 0.541886868370571 | 0.406626312780078 | -1.29822451991852 |
| 599 | Glycerophospho-N-palmitoylethanolamine | 0.915907376972188 | 1.56326177457578 | 1.86639309890872 | 0.0152978567661771 | 0.511743888463837 | 0.585895076479265 | -0.771285768458814 |
| 653 | N-Nervonoyl-D-erythro-sphingosylphosphorylcholine | 30.4970481850984 | 18.9688393917905 | 1.82073980281374 | 0.0173927019289921 | 0.511743888463837 | 1.60774455174612 | 0.685038200543595 |
| 656 | Ciprostene | 0.0828636332590991 | 0.246536899173552 | 2.18828878397232 | 0.0134695383014508 | 0.511743888463837 | 0.336110470833684 | -1.57299260733063 |
| 687 | 3,5,9-Trioxa-4-phosphatetracosan-1-aminium, 7-(acetyloxy)-24-carboxy-4-hydroxy-N,N,N-trimethyl-, inner salt, 4-oxide, (R)- | 0.207943514094908 | 0.395096935502723 | 1.80247403217082 | 0.0155315694194681 | 0.511743888463837 | 0.526310116352382 | -0.926014969349575 |
| 688 | 1-Lignoceroyl-2-hydroxy-sn-glycero-3-phosphocholine | 0.122729129239932 | 0.212414576777132 | 1.67895868576176 | 0.0426754391568931 | 0.57776460770312 | 0.577781106654941 | -0.79140506609884 |
| 733 | 4-Methyl-1H-pyrazole | 0.522600632032612 | 0.436516991705536 | 2.25940290148372 | 0.00241135604655426 | 0.511743888463837 | 1.19720570324361 | 0.259671056669731 |
| 734 | N5-(1-Iminoethyl)-L-ornithine | 0.0544176508260375 | 0.12118788099332 | 1.80255234044118 | 0.0205587281416515 | 0.513993439805172 | 0.449035418228303 | -1.1550988510633 |
| 749 | Maltotetraose | 0.0138998903920844 | 0.0287735825512867 | 1.79614932183668 | 0.0221588620565985 | 0.518230710685702 | 0.483078197416289 | -1.04967135325213 |
| 759 | (2-{[3-hydroxy-2-tetradecanamidooctadec-4-en-1-yl phosphonato]oxy}ethyl)trimethylazanium | 0.893040575919032 | 1.31668609078504 | 1.55708845889945 | 0.0491075780132761 | 0.592738721371853 | 0.678248659395028 | -0.560113803963055 |
| 844 | 2-(Hydroxymethyl)-5-methyl-4H,7H-[1,2,4]triazolo[1,5-a]pyrimidin-7-one | 0.131237097496044 | 0.162540485298837 | 1.69165111089118 | 0.0477411814530253 | 0.592283540701275 | 0.807411748862195 | -0.308623514878572 |
| 845 | (2E)-4-Hydroxybut-2-enoic acid | 0.785065668885881 | 1.04997187667093 | 2.05219727437304 | 0.0147823423178746 | 0.511743888463837 | 0.747701615947117 | -0.419465443861167 |
| 883 | N-Docosanoyltaurine | 0.903251350865371 | 2.97157205152742 | 2.10572127983075 | 0.00716631832965982 | 0.511743888463837 | 0.303964142616394 | -1.71802694990485 |
| 886 | 9H-Carbazole, 2-[(2E)-2-(1-azabicyclo[2.2.2]oct-3-ylidene)-2-fluoroethoxy]- | 0.237929958458367 | 0.573938373093079 | 1.95531478461627 | 0.0188273100318401 | 0.511743888463837 | 0.414556631186918 | -1.27035889798712 |
| 888 | 3,4-Difluoro-L-phenylalanine | 0.239763746654553 | 0.379664799987579 | 1.69566455790997 | 0.0356132867936813 | 0.556547052196154 | 0.631514290138032 | -0.663112714670238 |
| 892 | GKK 1032B | 0.772970423853633 | 1.25589196339647 | 1.71157725243445 | 0.0494931519109443 | 0.592738721371853 | 0.615475252953437 | -0.70022724493491 |
| 893 | 3-(4-Methylphenyl)-2-sulfanyl-5,6,7,8-tetrahydro[1]benzothieno[2,3-d]pyrimidin-4(3H)-one | 0.00583795643889005 | 0.00114197636691064 | 1.84738344960258 | 0.000250155269844103 | 0.511743888463837 | 5.11215171175856 | 2.3539306513385 |
| 913 | PC(18:1(9Z)/P-16:0) | 1.28859434259039 | 0.63671154341451 | 1.89521061180958 | 0.00927467775969851 | 0.511743888463837 | 2.02382751799977 | 1.01708634065979 |
| 925 | 9,10-Anthracenedione, 3-(1,2-dihydroxypropyl)-1,6,8-trihydroxy- | 0.00829018211280427 | 0.0267796817294022 | 2.2717580454398 | 0.00156140932483978 | 0.511743888463837 | 0.309569852120469 | -1.69166311537563 |
| 927 | 1-(Pyrimidin-2-yl)-1,4-diazepane | 0.317247998964323 | 0.2768085227211 | 2.07614823834129 | 0.00606919496590732 | 0.511743888463837 | 1.1460918755163 | 0.196722701196732 |
| 942 | 3-[(Methylsulfonyl)amino]benzoic acid | 0.0570209726755892 | 0.0800807144711356 | 1.87532425215656 | 0.0251309445346722 | 0.525372237901318 | 0.712043755505477 | -0.489962196517089 |
| 1000 | 2-(3-Carboxy-4-chlorophenyl)-1,3-dioxo-2,3-dihydro-1H-isoindole-5-carboxylic acid | 0.598977040091767 | 0.530325619190329 | 1.8957206673994 | 0.00992949023645881 | 0.511743888463837 | 1.12945145099015 | 0.175622258406005 |
| 1032 | Farrerol | 0.0606172673177393 | 0.0959072544504561 | 1.60054720894189 | 0.0379066255274049 | 0.567609699746456 | 0.632040481870462 | -0.661911129644193 |
| 1082 | 3-Trifluoromethyl-4-nitrophenol | 0.347253192008656 | 0.0597408033563396 | 1.476006494823 | 0.0443649549980168 | 0.578620881067488 | 5.8126635816625 | 2.53919941242115 |
| 1087 | MCPA | 0.902993727520758 | 0.757548770176127 | 2.0319909351559 | 0.0085398776032213 | 0.511743888463837 | 1.19199418317426 | 0.253377195593595 |
| 1103 | (2E,4E)-5-Phenyl-2,4-pentadienoic acid | 0.0373266119484275 | 0.0199594702962035 | 1.59213327265769 | 0.0294739108925786 | 0.53502821011645 | 1.87012036865164 | 0.903131130897987 |
| 1110 | Alpinumisoflavone | 0.222751162226763 | 0.0355249546389772 | 1.52739989612129 | 0.0444080510046851 | 0.578620881067488 | 6.27027295292772 | 2.64852824673769 |
| 1175 | L-Erythrulose | 1.00056863121039 | 1.39504213553857 | 1.93266452916074 | 0.0218819213787859 | 0.518230710685702 | 0.717231835312353 | -0.479488569274578 |
| 1256 | PC(22:4(7Z,10Z,13Z,16Z)/P-18:0) | 1.08094472555462 | 0.759916955505456 | 1.6746388960304 | 0.0346997237881915 | 0.552733707924163 | 1.42245112143291 | 0.508379079190632 |
| 1262 | PC(20:3(5Z,8Z,11Z)/14:0) | 2.01460216474123 | 3.29464937950422 | 1.88155537307361 | 0.00964446822804214 | 0.511743888463837 | 0.611476953290972 | -0.709629970622687 |
| 1306 | Maslinic_Acid | 0.0117925460334504 | 0.026772290897151 | 1.82226454539775 | 0.00581641747113392 | 0.511743888463837 | 0.440475791883215 | -1.18286536266503 |
| 1318 | 1-Hexanone, 1-oxazolo[4,5-b]pyridin-2-yl-6-phenyl- | 0.0832006052717569 | 0.162073314535197 | 1.78103718010497 | 0.0395392041545092 | 0.57776460770312 | 0.513351661316758 | -0.961980640933241 |
| 1329 | 1,2,4-Triazolo[3,4-f][1,6]naphthyridin-3(2H)-one, 8-[4-(1-aminocyclobutyl)phenyl]-9-phenyl- | 0.0548675809059979 | 0.0254696883588652 | 2.0835426515107 | 0.0255603174170687 | 0.525401030104651 | 2.15423055566757 | 1.1071726620076 |
| 1332 | 3-Oxocyclobutanecarboxylic acid | 1.18030557396021 | 1.63096075281291 | 1.93141737331438 | 0.0209157874033144 | 0.514236659874294 | 0.723687294083895 | -0.466561652729744 |
| 1335 | LysoPC(22:6(4Z,7Z,10Z,13Z,16Z,19Z)) | 3.49924001345468 | 5.25507451464032 | 1.6448284321001 | 0.0293234863963159 | 0.535010708107565 | 0.665878286541134 | -0.586669598447819 |
| 1343 | Acifluorfen | 0.0199600985516222 | 0.0153288422671402 | 1.64282876881062 | 0.0246779466190729 | 0.525372237901318 | 1.30212694499504 | 0.380870104407678 |
| 1347 | Sesamol | 0.00561809785736771 | 0.0172353116654009 | 1.38143212774229 | 0.0107027556186219 | 0.511743888463837 | 0.325964390226013 | -1.61721372813162 |
| 1348 | 24-epi-brassinolide | 0.0964182367061663 | 0.203633261573437 | 1.88333843807392 | 0.0059982363410414 | 0.511743888463837 | 0.473489625227039 | -1.07859528017043 |
| 1352 | Neohancoside D | 0.0269562423910211 | 0.0375359299163189 | 1.92004889938964 | 0.0211492725252321 | 0.514236659874294 | 0.718145053316017 | -0.477652821084207 |
| 1355 | 4-Oxo-4-((3-oxodecan-2-yl)amino)butanoic acid | 0.0448355386301589 | 0.0713122105620491 | 1.50701483911765 | 0.0379917777734969 | 0.567609699746456 | 0.62872176134755 | -0.66950639627733 |
| 1358 | PE(P-18:1(9Z)/18:1(9Z)) | 0.32013003963221 | 0.125026534073688 | 1.47775180925744 | 0.037775551195726 | 0.567609699746456 | 2.56049679377285 | 1.35642375256039 |
| 1391 | 1H-Indazole-4-carboxamide, N-[(1,2-dihydro-6-methyl-2-oxo-4-propyl-3-pyridinyl)methyl]-1-(1-methylethyl)-6-[2-(4-methyl-1-piperazinyl)-4-pyridinyl]- | 1.10855496323547 | 1.60735266062398 | 1.81003979868234 | 0.0364534365955338 | 0.562718622011362 | 0.689677499152631 | -0.536006195516879 |
| 1402 | Putative Phenylalanine conjugated chenodeoxycholic acid | 0.21758809580552 | 0.408381262471697 | 1.55798837181134 | 0.0281885818585006 | 0.530224626873202 | 0.532806266596524 | -0.908317044132537 |
| 1427 | Carebastine | 0.0772421105637437 | 0.137892012098347 | 1.72286459696003 | 0.0403487950550704 | 0.57776460770312 | 0.560163778802889 | -0.836079395714319 |
| 1428 | Deoxycoformycin | 0.307992094930397 | 0.121144826623342 | 2.15571417821224 | 0.0249865402231786 | 0.525372237901318 | 2.54234624387215 | 1.34616052534699 |
| 1435 | Dimethyltin oxide | 0.300819155763534 | 0.372549452376124 | 1.96928982448429 | 0.0158617202139176 | 0.511743888463837 | 0.807461006437955 | -0.308535503411335 |
| 1438 | 6-O-p-Coumaroyl-1,2-di-O-galloyl-.beta.-D-glucopyranose | 0.00413988349071763 | 0.0225803617448084 | 1.81538911038324 | 0.0193433571573729 | 0.511743888463837 | 0.183339998601637 | -2.44740652729086 |
| 1470 | s-phenylmercapturic_acid | 0.0196376227039926 | 0.00480763992644206 | 1.44437343775967 | 0.0327359644784123 | 0.546175980051432 | 4.08467002613602 | 2.03021953715059 |
| 1478 | Ganglioside_GA2_(d18:1/9Z-18:1) | 0.122445822828676 | 0.240737967721339 | 1.73830643033192 | 0.0133423648237838 | 0.511743888463837 | 0.508626968930846 | -0.97532013480338 |
| 1487 | Hydroxytolbutamide | 0.0346255674685315 | 0.0695796440664406 | 1.56895906953675 | 0.0425469006818173 | 0.57776460770312 | 0.497639330196458 | -1.00682758362084 |
| 1514 | (4E,8E,12E,16E)-2,3,7,11,15-Pentahydroxy-4,6,8,10,12,14,16-heptamethyloctadeca-4,8,12,16-tetraenoic acid | 0.122485059253377 | 0.206120307709725 | 1.62226917743465 | 0.0450154314253309 | 0.583526957873745 | 0.594240619055692 | -0.75088087155963 |
| 1533 | Cys-Gly-Cys | 0.00813648133211708 | 0.0144619994456401 | 1.87804896492252 | 0.0198907768175026 | 0.511743888463837 | 0.562611094178267 | -0.829790093322272 |
| 1589 | Tyr-Phe | 0.190110995189895 | 0.0709937671436527 | 1.60702412266849 | 0.0196039176858924 | 0.511743888463837 | 2.67785473061619 | 1.42107769886081 |
| 1645 | M201T112 | 2.89529632123793 | 1.74293386386297 | 1.45430349695202 | 0.0345433573831976 | 0.552733707924163 | 1.66116246936697 | 0.732193182443726 |
| 1661 | M402T177 | 0.0334882856360715 | 0.0283855068914529 | 1.86198788627052 | 0.0183454861384116 | 0.511743888463837 | 1.17976704675846 | 0.238502017498254 |
| 1686 | M277T182 | 0.0813319391893393 | 0.105619728372755 | 2.02180246884079 | 0.0159940568305737 | 0.511743888463837 | 0.770044956963924 | -0.376985418825854 |

| **Supplementary Table 1C. The results of the differential metabolite screening for CD-NAFLD vs only-NAFLD.** | | | | | | | | |
| --- | --- | --- | --- | --- | --- | --- | --- | --- |
| **id** | **Name** | **Mean.UC** | **Mean.CD** | **VIP** | **P.value** | **FDR** | **Fold.Change** | **Log2.Fold.Change** |
| 17 | Glycine | 0.571698523670462 | 0.345065276784948 | 2.30420993592397 | 0.0420357789921015 | 0.729962064949149 | 1.65678369321048 | 0.728385259105544 |
| 163 | Asparagine | 0.349277010854758 | 0.241507366587097 | 2.1544198791603 | 0.0436993735832307 | 0.729962064949149 | 1.44623750318935 | 0.532304493186077 |
| 253 | Erucamide | 1.48678768121678 | 0.814245419019696 | 2.03910840277869 | 0.0266761045710904 | 0.729962064949149 | 1.82596996739237 | 0.868663036816985 |
| 359 | 1-oleoyl-2-myristoyl-sn-glycero-3-phosphocholine | 1.59298832725689 | 2.7342088513132 | 1.20268983982507 | 0.0314234866514201 | 0.729962064949149 | 0.582613989597686 | -0.779387751320376 |
| 570 | cis-4,10,13,16-Docosatetraenoic acid | 0.255025135138182 | 0.581129039935476 | 1.24350965199146 | 0.0225541526504786 | 0.729962064949149 | 0.438844245619695 | -1.18821910488443 |
| 701 | (3-Oxo-2-piperazinyl)acetic acid | 0.763839504138898 | 1.0125929714305 | 1.73980346542216 | 0.0432810789832977 | 0.729962064949149 | 0.754340120551911 | -0.406712935326428 |
| 857 | 2-Arachidonoyl-1-stearoyl-sn-glycero-3-phosphoethanolamine | 2.99719607597576 | 7.1526146907472 | 1.17545162314761 | 0.0414882807980041 | 0.729962064949149 | 0.419035025031197 | -1.25485725829695 |
| 992 | Glyceryl trimyristate | 0.336565420725415 | 0.597242477737209 | 1.09275129648818 | 0.0440464172036024 | 0.729962064949149 | 0.563532289264774 | -0.827429818602438 |
| 1013 | (-)-Catechin | 0.0769959123534123 | 2.6669034824951 | 1.38793096353103 | 0.0469580164268021 | 0.729962064949149 | 0.0288709032249553 | -5.11423994684301 |
| 1014 | (1,5-Dimethyl-1H-pyrazol-3-yl)methylamine | 0.0280632452448988 | 0.0429543991722436 | 1.99362001353072 | 0.0131036418388173 | 0.729962064949149 | 0.653326452835889 | -0.614124040021201 |
| 1274 | (3beta,5alpha,6beta,22E,24R)-23-Methylergosta-7,22-diene-3,5,6-triol | 0.389142122619131 | 0.850173347862646 | 1.23137943678276 | 0.0399878747578632 | 0.729962064949149 | 0.457720914913933 | -1.12745987952029 |
| 1290 | Endothal | 0.0250607786340269 | 0.0939631302516885 | 2.20018188480088 | 0.0461118808510209 | 0.729962064949149 | 0.266708639515301 | -1.90666353590028 |
| 1329 | 1,2,4-Triazolo[3,4-f][1,6]naphthyridin-3(2H)-one, 8-[4-(1-aminocyclobutyl)phenyl]-9-phenyl- | 0.0256358785746993 | 0.0548675809059979 | 1.66013520421988 | 0.0425150902500369 | 0.729962064949149 | 0.467231799751115 | -1.0977896276429 |
| 1396 | PE(20:1(11Z)/14:1(9Z)) | 0.789187846070542 | 1.47856875969915 | 1.37545830720805 | 0.0373690201718378 | 0.729962064949149 | 0.533751197496638 | -0.905760693394472 |
| 1415 | (2-aminoethoxy)[2-[docosa-4.7.10.13.16-pentaenoyloxy]-3-(octadecanoyloxy)propoxy]phosphinic acid | 0.115987056655324 | 0.385756899564183 | 1.39040748497598 | 0.026563348549401 | 0.729962064949149 | 0.300673965355805 | -1.73372814110296 |
| 1458 | Pentosan_Polysulfate | 0.133884612233405 | 0.170230929829617 | 1.83497214538383 | 0.0476652114934812 | 0.729962064949149 | 0.786488168556733 | -0.346503032098169 |
| 1582 | 2,6-Dioxo-4-piperidinecarboxylic acid | 0.0613817544581108 | 0.0340734690633496 | 2.19005072868137 | 0.0351973371010057 | 0.729962064949149 | 1.80145304089787 | 0.849161045022123 |
| 1612 | 3-(Pyrazol-1-yl)-L-alanine | 0.154044763117832 | 0.253886680121329 | 1.67827768604858 | 0.0389814227411363 | 0.729962064949149 | 0.606746139829849 | -0.720835070029369 |

Supplementary Materials 1: STROBE Statement—checklist of items that should be included in reports of observational studies

Study Title: Characterization of the Gut Virome in Patients with Inflammatory Bowel Disease and Non-Alcoholic Fatty Liver Disease

Note: Items marked with * are special requirements of the STROBE Statement, with separate information provided for the IBD-NAFLD case group and the NAFLD-only control group.

|  | Item No | Recommendation |  |  |
| --- | --- | --- | --- | --- |
| **Title and abstract** | 1 | (*a*) Indicate the study’s design with a commonly used term in the title or the abstract | Title Page (P1), Abstract (P1) | The title is a characterization study, and the abstract labels the research as a **correlation study** (cross-sectional observational study design) |
| (*b*) Provide in the abstract an informative and balanced summary of what was done and what was found | Abstract (P1) | Divided into Objectives, Materials and Methods, Results, and Conclusion; elaborates on the methods of VLP combined with metagenomic sequencing and serum metabolomics, as well as the core differential results of the virome and metabolome |
| Introduction | | |  |  |
| Background/rationale | 2 | Explain the scientific background and rationale for the investigation being reported | Introduction (P1-P4) | Details the epidemiology of IBD-NAFLD comorbidity and the research gap of the virome in the gut-liver axis, clarifying the theoretical basis and research significance of this study |
| Objectives | 3 | State specific objectives, including any prespecified hypotheses | Abstract (P1), Last Paragraph of Introduction (P4) | To characterize the gut virome of IBD-NAFLD patients and explore its association with the serum metabolome; Hypothesis: Virome dysbiosis is involved in the pathogenesis of IBD-NAFLD through regulating the gut-liver axis |
| Methods | | |  |  |
| Study design | 4 | Present key elements of study design early in the paper | 2.1 Human Subjects (P4), 2.2 Ethical Standards (P8) | Clearly defined as a **case-control cross-sectional study**, with CD-NAFLD and UC-NAFLD subgroups set up, and key confounding factors (age, gender, BMI) matched |
| Setting | 5 | Describe the setting, locations, and relevant dates, including periods of recruitment, exposure, follow-up, and data collection | 2.1 Human Subjects (P4) | Setting: Department of Gastroenterology, the Third Affiliated Hospital of Nanjing Medical University; Recruitment and data collection period: January 1 to June 30, 2024 |
| Participants | 6 | (*a*) *Cohort study*—Give the eligibility criteria, and the sources and methods of selection of participants. Describe methods of follow-up  *Case-control study*—Give the eligibility criteria, and the sources and methods of case ascertainment and control selection. Give the rationale for the choice of cases and controls  *Cross-sectional study*—Give the eligibility criteria, and the sources and methods of selection of participants | 2.1 Human Subjects (P4-P6) | Both cases and controls have diagnostic criteria based on international guidelines, with exclusion of underlying diseases and recent medication history; Subjects are hospital outpatients/inpatients screened by senior gastroenterologists |
| (*b*)*Cohort study*—For matched studies, give matching criteria and number of exposed and unexposed  *Case-control study*—For matched studies, give matching criteria and the number of controls per case | 2.1 (P4/P6), 3.1 (P9) | Matching criteria: age, gender, BMI; Final enrollment: 10 cases (5 CD-NAFLD, 5 UC-NAFLD) and 5 controls; Initial recruitment: 32 subjects |
| Variables | 7 | Clearly define all outcomes, exposures, predictors, potential confounders, and effect modifiers. Give diagnostic criteria, if applicable | 2.1 (P4-P6), 3.2-3.3 (P9-P16) | Outcomes: virome and metabolome characteristics; Exposure: comorbidity of IBD and NAFLD; Diagnostic criteria refer to ECCO-ESGAR (2019) and APASL (2020) guidelines |
| Data sources/ measurement | 8* | For each variable of interest, give sources of data and details of methods of assessment (measurement). Describe comparability of assessment methods if there is more than one group | 2.3-2.9 (P8-P16), 3.2-3.3 (P9-P16) | Samples: fecal samples (virome), peripheral blood samples (metabolome); The same detection and analysis procedures were used across groups, with separate information provided for each group |
| Bias | 9 | Describe any efforts to address potential sources of bias | 2.1 (P4), 2.3 (P8), 4 Discussion (P16-P20) | Unified diagnostic criteria, sample processing within 2 hours, matching of confounding factors, dual software validation of viral sequences, and discussion of the impact of potential biases |
| Study size | 10 | Explain how the study size was arrived at | 2.1 (P4), 4 Discussion (P18) | Determined based on references to previous gut virome studies and the feasibility of clinical sample collection; 32 subjects initially recruited and 15 finally enrolled; small sample size is noted as a limitation of this exploratory study |
| Quantitative variables | 11 | Explain how quantitative variables were handled in the analyses. If applicable, describe which groupings were chosen and why | 3.2.1 (P9), 3.3.2 (P12) | Quantitative variables: viral abundance (RPKM), metabolite concentration; Grouping by disease type, statistical thresholds, and taxonomic levels |
| Statistical methods | 12 | (*a*) Describe all statistical methods, including those used to control for confounding | 2.8 (P8), 3.2-3.3 (P9-P16) | Student’s t-test, Pearson/Spearman correlation analysis, LEfSe analysis, PCA/PCoA analysis; Confounding factors controlled by age, gender and BMI matching |
| (*b*) Describe any methods used to examine subgroups and interactions | 3.2-3.3 (P9-P16) | Subgroup analysis: CD-NAFLD and UC-NAFLD subgroups; Interaction analysis: correlation between viral abundance and metabolite levels |
| (*c*) Explain how missing data were addressed | 2.1 (P4), 3.1 (P9) | 17 subjects excluded due to poor sample quality or incomplete sample collection; 15 subjects with complete data finally enrolled, and all analyses were based on the complete sample set |
| (*d*) *Cohort study*—If applicable, explain how loss to follow-up was addressed  *Case-control study*—If applicable, explain how matching of cases and controls was addressed  *Cross-sectional study*—If applicable, describe analytical methods taking account of sampling strategy | 2.1 (P4), 3.1 (P9), Table1 | Individual matching was adopted; the matching effect was verified (no significant differences in baseline characteristics among groups), and baseline characteristics after matching were presented separately for each group |
| (*e*) Describe any sensitivity analyses | 3.3.5 (P15), 4 Discussion (P18) | Viral host prediction was validated by both CHERRY and PHP software; the optimal viral sequence assembly pipeline was screened by multiple software, with consistent results |
| Results | | |  |  |
| Participants | 13* | (a) Report numbers of individuals at each stage of study—eg numbers potentially eligible, examined for eligibility, confirmed eligible, included in the study, completing follow-up, and analysed | 2.1 (P4), 3.1 (P9), Figure1 | 32 potentially eligible → 15 enrolled and analysed; Reasons for non-participation: poor sample quality, withdrawal of informed consent; Figure1 is the study flow chart |
| (b) Give reasons for non-participation at each stage |
| (c) Consider use of a flow diagram |
| Descriptive data | 14* | (a) Give characteristics of study participants (eg demographic, clinical, social) and information on exposures and potential confounders | 3.1 (P9), Table1 | Demographic, clinical biochemical and disease characteristics were provided separately for each group; no missing data for all variables, clearly stated |
| (b) Indicate number of participants with missing data for each variable of interest |
| (c) *Cohort study*—Summarise follow-up time (eg, average and total amount) |
| Outcome data | 15* | *Cohort study*—Report numbers of outcome events or summary measures over time | 3.3.2/3.3.4 (P12-P15), Figure5-6 | Viral abundance (RPKM) at all taxonomic levels was reported by exposure status, and the abundance characteristics of differential viruses such as Caudovirales were clearly identified |
| *Case-control study—*Report numbers in each exposure category, or summary measures of exposure |
| *Cross-sectional study—*Report numbers of outcome events or summary measures |
| Main results | 16 | (*a*) Give unadjusted estimates and, if applicable, confounder-adjusted estimates and their precision (eg, 95% confidence interval). Make clear which confounders were adjusted for and why they were included | 3.2.1 (P9), 3.3.4 (P15) | P values, VIP values and LDA values (effect estimates) were provided; confounders including age, gender, BMI and disease activity were adjusted for, with an LDA threshold of >2 |
| (*b*) Report category boundaries when continuous variables were categorized | 3.2.1 (P9), 3.3.2 (P12), Figure5 | Metabolites: P≤0.05, VIP≥1, |
| (*c*) If relevant, consider translating estimates of relative risk into absolute risk for a meaningful time period | 4 Discussion (P18) | The prevalence of NAFLD in IBD patients (24.4%) was reported, which is much higher than that in the healthy population; the relative differences in viral abundance were correlated with the clinical absolute risk of NAFLD in IBD patients |
| Other analyses | 17 | Report other analyses done—eg analyses of subgroups and interactions, and sensitivity analyses | 3.2-3.3 (P9-P16), 4 Discussion (P18) | Subgroup and interaction analyses were completed; results of sensitivity analyses and negative results (no significant intergroup difference in alpha diversity, Figure8A) were reported |
| Discussion | | |  |  |
| Key results | 18 | Summarise key results with reference to study objectives | Opening of 4 Discussion (P16), 5 Conclusion (P20) | Key results are highly consistent with study objectives, clarifying the specific gut virome characteristics, core viral host and key differential metabolic pathway of IBD-NAFLD patients |
| Limitations | 19 | Discuss limitations of the study, taking into account sources of potential bias or imprecision. Discuss both direction and magnitude of any potential bias | 4 Discussion (P18-P19) | Analyses of limitations including small sample size, lack of an IBD-only control group, only fecal and blood samples used, cross-sectional study design, and population heterogeneity, as well as the direction and magnitude of potential biases caused by these limitations |
| Interpretation | 20 | Give a cautious overall interpretation of results considering objectives, limitations, multiplicity of analyses, results from similar studies, and other relevant evidence | 4 Discussion (P16-P20) | The innovative points of this study were interpreted in combination with previous relevant studies; it was clearly stated that the cross-sectional design only identified **associative relationships**; the potential mechanism of the gut virome regulating the gut-liver axis was reasonably inferred |
| Generalisability | 21 | Discuss the generalisability (external validity) of the study results | 4 Discussion (P19) | The results can be generalised to the population of **Han Chinese patients with newly diagnosed mild-to-moderate IBD-NAFLD**; caution is needed when generalising to other ethnic groups or patients with severe disease due to the single-center design and small sample size |
| Other information | | |  |  |
| Funding | 22 | Give the source of funding and the role of the funders for the present study and, if applicable, for the original study on which the present article is based | Funding Section on Title Page (P1) | Three funding sources were indicated; the funders only provided financial support and did not participate in study design, data collection, data analysis or manuscript writing |
